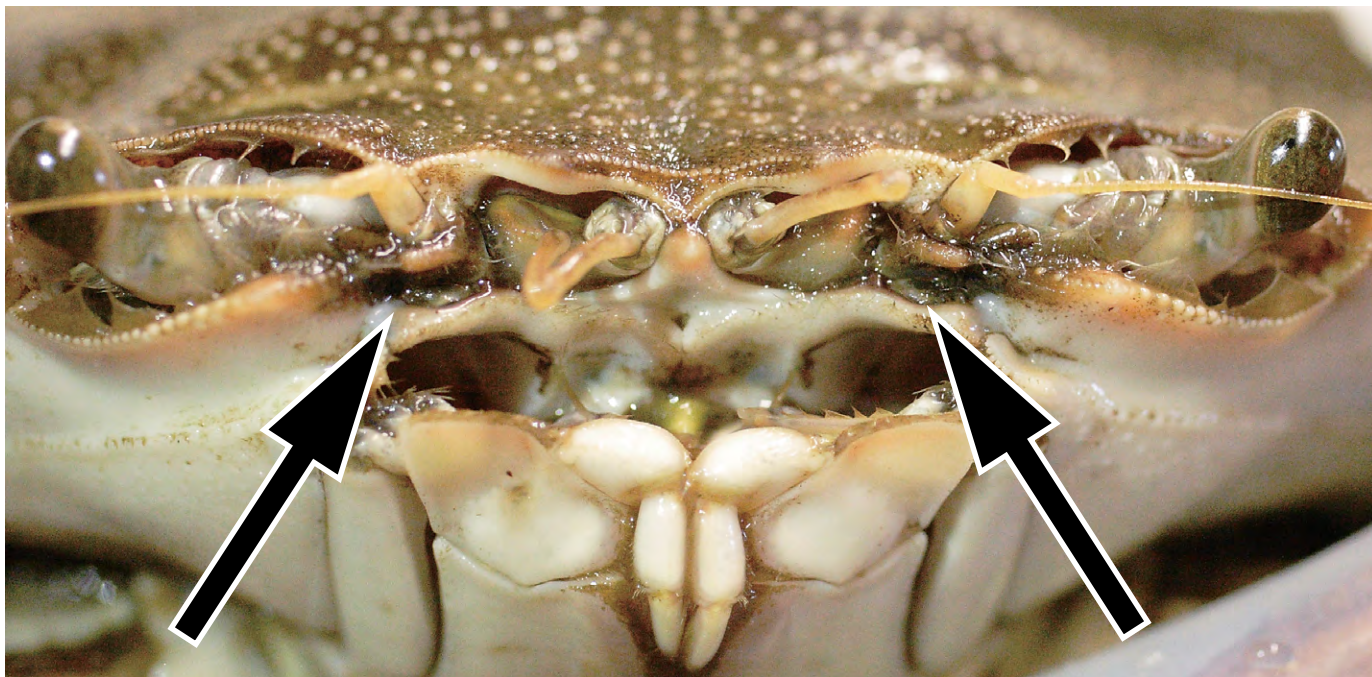

**Fig. S1. Nephropore of blue crabs and the collection of urine.** The arrows indicate the cuticular lid of the nephropore. Urine was released by lifting this lid and collected using a micropipette tip connected to a vacuum pump.
